# Supplementary material for: Ezrin activation by LOK phosphorylation involves a PIP2-dependent wedge mechanism
Source: eLife. 2017 Apr 21;6:e22759. doi: 10.7554/eLife.22759 (PMC5400502; doi:10.7554/eLife.22759)
Supplement: Figure 3—source data 1. — DOI: http://dx.doi.org/10.7554/eLife.22759.010 [file elife-22759-fig3-data1.xlsx]

## Sheet: GST vs GST-ezrin-CTD
Conc (immobile fraction	GST				GST-CTD
0	0	0	0		0	0	0
0.229687	-0.0693642	-0.0116402	0.00793651		0.0656085	0.0656085	0.0656073
0.91875	-0.0924855	0.0973545	0.15873		0.129541	0.391534	0.260481
3.675	-0.0115607	0.174603	0.0555556		0.624768	0.798942	0.869585
14.7	0.17341	0.037037	0.343651		0.754599	0.926138	0.898066
	GST				GST-CTD
Hyperbola (X is concentration)
Best-fit values
Bmax	0.3099				1.026
Kd	10.15				1.984
Std. Error
Bmax	0.293				0.08755
Kd	19.59				0.5633
95% CI (asymptotic)
Bmax	-0,323 to 0,9428				0,837 to 1,215
Kd	-32,16 to 52,46				0,7675 to 3,201
Goodness of Fit
Degrees of Freedom	13				13
R square	0.4049				0.932
Absolute Sum of Squares	0.1082				0.1352
Sy.x	0.09123				0.102
Number of points
# of X values	20				20
# Y values analyzed	15				15

## Sheet: CNBr vs CNBr-FERM
Conc (immobile fraction	CnBr				CnBr-FERM
0	0	0	0		0	0	0
0.28125	0	0	0		0.165348	0	0
1.125	0.216002	0.106996	0.0700935		0.407432	0	0.112108
4.5	0.163056	0.205761	0.121495		0.526555	0.211823	0.38565
18	0.131152	0.197531	0.271028		0.735106	0.876847	0.92287
	CnBr				CnBr-FERM
Hyperbola (X is concentration)
Best-fit values
Bmax	0.2156				1.324
Kd	1.238				10.37
Std. Error
Bmax	0.03231				0.3084
Kd	0.7172				5.25
95% CI (asymptotic)
Bmax	0,1458 to 0,2854				0,6577 to 1,99
Kd	-0,3111 to 2,788				-0,9728 to 21,71
Goodness of Fit
Degrees of Freedom	13				13
R square	0.7522				0.8831
Absolute Sum of Squares	0.03215				0.1847
Sy.x	0.04973				0.1192
Number of points
# of X values	20				20
# Y values analyzed	15				15
