# Supplementary material for: Ezrin activation by LOK phosphorylation involves a PIP2-dependent wedge mechanism
Source: eLife. 2017 Apr 21;6:e22759. doi: 10.7554/eLife.22759 (PMC5400502; doi:10.7554/eLife.22759)
Supplement: Figure 4—source data 1. — DOI: http://dx.doi.org/10.7554/eLife.22759.012 [file elife-22759-fig4-data1.xlsx]

## Sheet: Figure 4D
	sgLOK/siSLK	Microvilli =1	No microvilli=0
	Cell#	GFP	LOK	LOK-1-348	LOK1-348-EBP50t
Exp1	1	0	1	0	1
	2	0	1	1	1
	3	0	1	0	1
	4	0	0	0	0
	5	1	1	0	0
	6	1	1	0	1
	7	0	1	0	1
	8	0	1	0	0
	9	0	1	0	1
	10	0	1	0	0
	11	0	1	0	1
	12	0	1	0	0
	13	0	1	0	1
	14	0	1	0	0
	15	1	1	1	1
	16	0	1	0	0
	17	0	1	0	0
	18	0	1	0	1
	19	0	1	0	1
	20	0	1	0	1
Exp2	21	0	1	0	0
	22	0	1	0	1
	23	0	1	0	1
	24	0	1	0	1
	25	0	1	0	1
	26	0	1	0	1
	27	0	1	0	0
	28	1	1	0	0
	29	0	1	0	1
	30	0	1	0	1
	31	0	1	0	1
	32	0	1	0	1
	33	0	1	0	0
	34	0	1	0	1
	35	0	1	0	1
	36	0	1	0	0
	37	0	1	0	1
	38	0	1	0	1
	39	0	0	0	1
	40	0	0	0	0
Exp3	41	0	1	0	0
	42	0	1	0	0
	43	0	1	0	1
	44	0	1	1	1
	45	0	1	0	1
	46	0	1	0	0
	47	0	1	0	1
	48	0	1	0	1
	49	0	1	0	1
	50	0	1	0	1
	51	0	1	0	0
	52	0	1	1	1
	53	0	1	0	0
	54	0	1	0	1
	55	0	1	0	0
	56	0	1	0	1
	57	0	1	0	1
	58	0	1	0	0
	59	0	1	0	1
	60	0	1	1	1
		GFP	LOK	LOK-1-348	LOK1-348-EBP50t
		3	19	2	12
		1	18	0	14
		0	20	3	13
		GFP	LOK	LOK-1-348	LOK1-348-EBP50t
		15.7895	100	10.5263	63.1579
		5.55556	100	0	77.7778
		0	100	15	65
	Mean	7.115	100	8.509	68.65
	Std. Deviation	8.009	0	7.701	7.962
	Std. Error of Mean	4.624	0	4.446	4.597

## Sheet: Figure4figuresuppl1B
	Kinase-suppression	Microvilli =1	No microvilli=0
	Cell#	Wt/siGL2	Wit/siSLK	sgLOK/siGL2	sgLOK/siSLK
Exp1	1	1	1	0	0
	2	1	1	0	1
	3	1	1	0	0
	4	1	1	0	0
	5	1	0	0	0
	6	1	1	0	0
	7	1	1	0	0
	8	1	1	1	0
	9	1	1	0	0
	10	1	1	0	0
	11	1	1	0	0
	12	1	1	0	0
	13	1	0	0	0
	14	1	0	0	0
	15	1	1	0	0
	16	1	1	0	0
	17	1	1	0	0
	18	1	1	0	0
	19	0	1	1	0
	20	1	1	1	0
Exp2	21	0	1	0	0
	22	1	0	0	0
	23	1	1	0	0
	24	1	1	0	0
	25	1	1	0	0
	26	1	1	0	0
	27	1	1	0	0
	28	1	1	0	0
	29	1	1	1	0
	30	1	1	1	0
	31	1	1	1	0
	32	1	1	0	1
	33	1	1	0	0
	34	1	1	0	0
	35	1	1	0	0
	36	1	1	1	0
	37	1	1	0	1
	38	1	1	0	0
	39	1	1	0	0
	40	1	1	0	0
Exp3	41	1	1	1	0
	42	1	1	0	0
	43	1	1	0	0
	44	1	1	0	0
	45	1	1	1	0
	46	1	0	0	0
	47	1	1	0	0
	48	1	1	0	0
	49	1	0	0	1
	50	1	1	0	1
	51	1	1	0	0
	52	1	1	1	0
	53	1	1	0	0
	54	1	1	0	0
	55	1	1	0	0
	56	1	1	0	0
	57	1	1	0	0
	58	1	1	0	0
	59	1	0	0	0
	60	1	0	0	0
		Wt/siGL2	Wit/siSLK	sgLOK/siGL2	sgLOK/siSLK
		19	17	2	1
		19	19	2	2
		20	16	4	2
		Wt/siGL2	Wit/siSLK	sgLOK/siGL2	sgLOK/siSLK
		100	89.4737	10.5263	5.26316
		100	100	10.5263	10.5263
		100	80	20	10
	Mean	100	89.82	13.68	8.596
	Std. Deviation	0	10	5.47	2.899
	Std. Error of Mean	0	5.776	3.158	1.674
