# Supplementary material for: Ezrin activation by LOK phosphorylation involves a PIP2-dependent wedge mechanism
Source: eLife. 2017 Apr 21;6:e22759. doi: 10.7554/eLife.22759 (PMC5400502; doi:10.7554/eLife.22759)
Supplement: Figure 5—source data 1. — DOI: http://dx.doi.org/10.7554/eLife.22759.015 [file elife-22759-fig5-data1.xlsx]

## Sheet: Data_summary
Conc of Inhibitor	LOK/Ezrin+PIP2			LOK/CTD			LOK1-348/CTD			LOK-N-EBP50t/Ezrin+PIP2
0	100	100		100	100		40.7155	82.8467		100	100
0.000999451	83.6352	97.3739		97.9613	94.7189		39.8637	84.6715		98.7539	89.3316
0.0039978	107.906	98.4949		86.8416	99.8296		50.4259	68.2482		97.229	94.4092
0.0159912	112.124	101.744		81.5802	81.9421		93.6968	61.3139		106.492	82.7155
0.0639648	75.0872	94.6282		74.6587	73.0835		85.0085	53.6496		94.4557	73.8477
0.255859	42.0422	81.5834		62.6309	68.3135		48.3816	24.0511		62.6187	45.122
1.02344	23.1369	13.9916		26.0949	37.8194		18.9097	32.8832		28.2847	22.4411
4.09375	23.3302	8.80753		16.4963	22.9983		14.2078	15.6569		25.6672	26.5881
16.375	19.5523	11.3054		14.4526	19.5911		13.3049	16.2774		27.5971	23.2356
65.5	23.7247	10.6217		16.4598	16.8314		12.2998	16.2409		27.0753	22.1669

## Sheet: Analysis_summary
	LOK/Ezrin+PIP2	LOK/CTD	LOK1-348/CTD	LOK-N-EBP50t/Ezrin+PIP2
log(inhibitor) vs. response -- Variable slope (four parameters)
Best-fit values
Bottom	16.83	21.23	17.03	25.43
Top	= 100	= 100	= 100	= 100
LogIC50	0.267	0.2823	0.08148	0.2127
HillSlope	-5.458	-3.096	-2.268	-5.24
IC50	1.849	1.915	1.206	1.632
Span	= 83,17	= 78,77	= 82,97	= 74,57
Std. Error
Bottom	3.839	3.008	5.767	2.509
LogIC50	0.03195	0.04889	0.05752	0.02114
HillSlope	1.986	0.7628	1.27	0.8863
95% CI (asymptotic)
Bottom	8,727 to 24,93	14,91 to 27,55	4,861 to 29,2	20,14 to 30,72
LogIC50	0,1996 to 0,3344	0,1795 to 0,385	-0,03988 to 0,2028	0,1681 to 0,2573
HillSlope	-9,649 to -1,268	-4,698 to -1,494	-4,947 to 0,4105	-7,11 to -3,37
IC50	1,583 to 2,16	1,512 to 2,426	0,9123 to 1,595	1,473 to 1,808
Goodness of Fit
Degrees of Freedom	17	18	17	17
R square	0.9349	0.9454	0.7044	0.961
Absolute Sum of Squares	2004	1283	4349	856.1
Sy.x	10.86	8.443	15.99	7.096
Constraints
Top	Top = 100	Top = 100	Top = 100	Top = 100
Number of points
# of X values	30	30	30	30
# Y values analyzed	20	21	20	20
