# Supplementary material for: Ezrin activation by LOK phosphorylation involves a PIP2-dependent wedge mechanism
Source: eLife. 2017 Apr 21;6:e22759. doi: 10.7554/eLife.22759 (PMC5400502; doi:10.7554/eLife.22759)
Supplement: Table 1—source data 1. — DOI: http://dx.doi.org/10.7554/eLife.22759.008 [file elife-22759-table1-data1.xlsx]

## Sheet: Data_summary
	LOK/CERMAD							LOK/Ezrin							LOK/Ezrin+PIP2							LOK1-348/CERMAD							LOK1-348/Ezrin+PIP2
0	0	0	0					0	0	0					0	0	0					0	0	0					0	0	0
5	0.0106589	0.0448527	0.0179923												0.343302	0.284039	0.444946
10	0.0142403	0.0266047	0.0331705					0.0182171	0.0127132	0.0148062					0.60176	0.443667	0.704085					0.00581395	0.00193798	0.00379845					0.0125581	0.00457364	0.00131783
20	0.0845891	0.0631008	0.0457054					0.022093	0.0182946	0.0143411					0.738023	0.672961	0.760961					0.00713178	0.0027907	0.0145736					0.0163566	0.00271318	0.00248062
40	0.232108	0.288558	0.244899												0.66938	0.691806	0.731287
50	0.339497	0.422064	0.358206					0.0258139	0.0372093	0.027907												0.030155	0.015969	0.0316279					0.0245736	0.00302326	0.0103101
100	0.48978	0.608896	0.51677					0.0557364	0.0609302	0.0551938												0.0662015	0.0524031	0.0551163					0.0486822	0.0260465	0.0113954
200	0.835637	1.03887	0.881686					0.114651	0.144806	0.0975194												0.0792248	0.0651938	0.0752713					0.0524806	0.0893798	0.049845
500	1.17797	1.46445	1.24288					0.226667	0.23	0.196744												0.104186	0.0936434	0.105116					0.130698	0.166822	0.155736

## Sheet: Analysis_summary#2
	LOK/ezrin-CTD	LOK/Ezrin	LOK/Ezrin+PIP2	LOK1-348/ezrin-CTD	LOK1-348/Ezrin+PIP2
Ezryme concentration, Et (µM)	0.01	0.01	0.01	0.01	0.01
Reaction volume (L)	1e-05	1e-05	1e-05	1e-05	1e-05
Ezryme Et (pmole)	0.1	0.1	0.1	0.1	0.1
Michaelis-Menten					Ambiguous
Best-fit values
Vmax (cpm)	25473	7229	10949	1783	65148
cpm/pmole	860	860	860	860	860
Vmax (pmole (32P))	29.6198	8.40581	12.7314	2.07326	75.7535
Reaction time (15*60 s)	900	900	900	900	900
Reaction time (15 min)	15	15	15	15	15
Vmax (pmole (32P))/s	0.0329109	0.00933979	0.014146	0.00230362	0.0841705
Vmax (pmole (32P))/min	1.97465	0.560388	0.84876	0.138217	5.05023
Vmax (µM (32P))/s	0.00329109	0.000933979	0.0014146	0.000230362	0.00841705
Inverting Vmax to kcat Y => kcat=Vmax/Et
kcat (1/s)	0.329109	0.0933979	0.14146	0.0230362	0.841705
kcat (1/min)	19.75	5.604	8.488	1.382	50.5
Reciprocal of kcat (s)	3.03851	10.7069	7.06914	43.41	1.18806
Reciprocal of kcat (min)
Km (µM)	252.3	782.1	5.453	176.2	16186
Catalytic efficiency: kcat (1/s)/Km (µM) = 1/(µM*s)	0.00130443	0.000119419	0.0259417	0.000130739	5.20021e-05
Catalytic efficiency: kcat (1/min)/Km (µM) = 1/(µM*min) (kcat from GraphPad prism)	0.0782798	0.00716532	1.55657	0.00784336	0.00311998
Catalytic efficiency: kcat (1/s)/Km (µM) = 1/(M*s)	1304.43	119.419	25941.7	130.739	52.0021
Std, Error
Vmax	2071	1233	864.9	130.3	355397
Vmax (pmole (32P))/min	0.160543	0.0955814	0.0670465	0.0101008	27.5502
Km	26.47	196.7	1.568	29.64	90692
kcat (1/min)	1.362	0.9559	0.6704	0.101	~ 275,5
95% Confidence Intervals
Vmax	31956 to 40626	4648 to 9810	9081 to 12817	1510 to 2056	(Very wide)
Km	158,3 to 269,1	370,3 to 1194	2,066 to 8,839	114,2 to 238,2	(Very wide)
Goodness of Fit
Degrees of Freedom	19	19	13	19	19
R square	0.9823	0.9781	0.9287	0.9675	0.948
Absolute Sum of Squares	27630000	405187	13550000	152944	480685
Sy,x	1206	146	1021	89.72	159.1
Constraints
Km	Km > 0,0	Km > 0,0	Km > 0,0	Km > 0,0	Km > 0,0
Number of points
Analyzed	21	21	15	21	21
